# Supplementary material for: Does Domestication Cause Changes in Growth Reaction Norms? A Study of Farmed, Wild and Hybrid Atlantic Salmon Families Exposed to Environmental Stress
Source: PLoS One. 2013 Jan 31;8(1):e54469. doi: 10.1371/journal.pone.0054469 (PMC3561353; doi:10.1371/journal.pone.0054469)
Supplement: Table S2 — AIC comparison of linear mixed effects models fitted for log-weight (g) at the time of termination. (XLS) [file pone.0054469.s002.xls]

## Sheet: Table S2
	Table S2: AIC comparison of linear mixed effects models fitted for log-weight (g) at the time of termination
				Effects
				Fixed				Random
	LME model	Response variable		Treatment	Type		Interaction term	Tank (intercept)	Family (intercept)	Family (co)variance matrix	AIC	∆AIC
	4	Weight (log)		x	x		x			2 x 2	-1290.4	0
	2	Weight (log)		x	x		x	x		2 x 2	-1288.5	1.9
	6	Weight (log)		x	x					2 x 2	-1283.3	7.1
	1	Weight (log)		x	x		x	x		6 x 6	-1270.5	19.9
	3	Weight (log)		x	x		x	x	x		-1269.5	20.9
	5	Weight (log)		x	x		x	x			-879.75	410.65
	The LME model were fitted by backward selection from the full model (LME model 1) using the lmer function in the lme4 package (R ver., 2.15.2)
	Model selection was performed based upon Akaike information criterion (AIC) values, calculated using the restricted maximum likelihood (REML).
	Models displaying less than 2 AIC values in distance were considered equally good. Thus, by the principle of parsimony, the simplest model that
	performed best was applied. Fixed effects: Treatment; Control and Stress. Type; genetic origin (i.e., farmed, hybrid, wild). Interaction term;
	interaction of treatment and type (genetic origin). Random effects: Tanks; Tanks nested within treatments (random intercept, lmer syntax:
	1|Treatment:Tank). Family; 29 families (10 farm, 9 hybrid, 10 wild) (random intercept, lmer syntax: 1|Family). Family related (co)variance matrix;
	2 x 2: across treatments (lmer syntax:Treatment|Family), 6 x 6: genetic origins across treatments (lmer syntax: Treatment:Type-1|Family).
